# Supplementary material
Source: bioRxiv or medRxiv preprint supplement (https://www.medrxiv.org/highwire/filestream/68440/field_highwire_adjunct_files/0/19002097-1.pdf)
Supplement: Supplementary file [file 19002097-1.pdf]

## Appendix

**Appendix Table 1. Acute hepatitis C virus infection cases, per registration database, by transmission route and HIV-serostatus**

| Year  | RIVM  |     |              |                  | SHM          |                  |
|-------|-------|-----|--------------|------------------|--------------|------------------|
|       | Total | MSM | HIV-positive | MSM HIV-positive | HIV-positive | MSM HIV-positive |
|       | N     | N   | N            | N                | N            | N                |
| 2003  | 15    | 3   |              |                  | 7            | 7                |
| 2004  | 39    | 10  |              |                  | 9            | 7                |
| 2005  | 25    | 7   |              |                  | 9            | 9                |
| 2006  | 29    | 11  |              |                  | 22           | 22               |
| 2007  | 55    | 32  |              |                  | 50           | 47               |
| 2008  | 48    | 34  |              |                  | 54           | 54               |
| 2009  | 48    | 26  |              |                  | 45           | 43               |
| 2010  | 31    | 19  |              |                  | 48           | 45               |
| 2011  | 71    | 50  |              |                  | 64           | 63               |
| 2012  | 56    | 45  |              |                  | 35           | 34               |
| 2013  | 66    | 54  | 40           | 38               | 58           | 52               |
| 2014  | 51    | 32  | 30           | 25               | 55           | 52               |
| 2015  | 70    | 53  | 43           | 40               | 69           | 66               |
| 2016  | 44    | 30  | 29           | 27               | 31           | 29               |
| total | 648   | 406 | 142          | 130              | 556          | 530              |

MSM=men who have sex with men; determined based on HCV transmission route for RIVM and HIV transmission route for SHM.

**Appendix Table 2. Number of confirmed acute hepatitis C virus (HCV) infections:  
by data source, after case-linkage**

Based on A) All HCV cases (acute, chronic, other) with a positive HIV-serostatus; and

B) HCV cases (acute, chronic, other) with both positive or unknown HIV-serostatus.

|                                                                                | Registered number of unique cases per database |      | Combined data |           |          |
|--------------------------------------------------------------------------------|------------------------------------------------|------|---------------|-----------|----------|
| <b>A) All HCV positive cases with a positive HIV-serostatus</b>                |                                                |      |               |           |          |
| Year                                                                           | SHM                                            | RIVM | SHM only      | RIVM only | SHM-RIVM |
|                                                                                | N                                              | N    | N (N1)        | N (N2)    | N (N12)  |
| 2013                                                                           | 167                                            | 40   | 127           | 0         | 40       |
| 2014                                                                           | 174                                            | 30   | 145           | 1         | 29       |
| 2015                                                                           | 171                                            | 43   | 128           | 0         | 43       |
| 2016                                                                           | 120                                            | 29   | 92            | 1         | 28       |
| 2013-2016                                                                      | 632                                            | 142  | 492           | 2         | 140      |
| <b>B) All HCV positive cases with both positive or unknown HIV-serostatus.</b> |                                                |      |               |           |          |
| Year                                                                           | SHM                                            | RIVM | SHM only      | RIVM only | SHM-RIVM |
|                                                                                | N                                              | N    | N (N1)        | N (N2)    | N (N12)  |
| 2013                                                                           | 167                                            | 60   | 112           | 5         | 55       |
| 2014                                                                           | 174                                            | 42   | 138           | 6         | 36       |
| 2015                                                                           | 171                                            | 59   | 117           | 5         | 54       |
| 2016                                                                           | 120                                            | 39   | 90            | 9         | 30       |
| 2013-2016                                                                      | 632                                            | 200  | 457           | 25        | 175      |
